# Supplementary material
Source: publisher figshare collection journal article supplement (https://tandf.figshare.com/ndownloader/files/13051595)
Supplement: Supplementary file 1 [file 13051595]

**Supplementary Material**

Isomer directed assembly of two Ca(II) compounds based on 5-(n-pyridyl)tetrazole-2-isopropanoic acid (n = 2, 3) and action against Hela cells

XIAO QING GU, GUANG MING LI, XIN ZHANG, DIAN YU CHEN, GAO WEN YANG* and QIAO YUN LI*


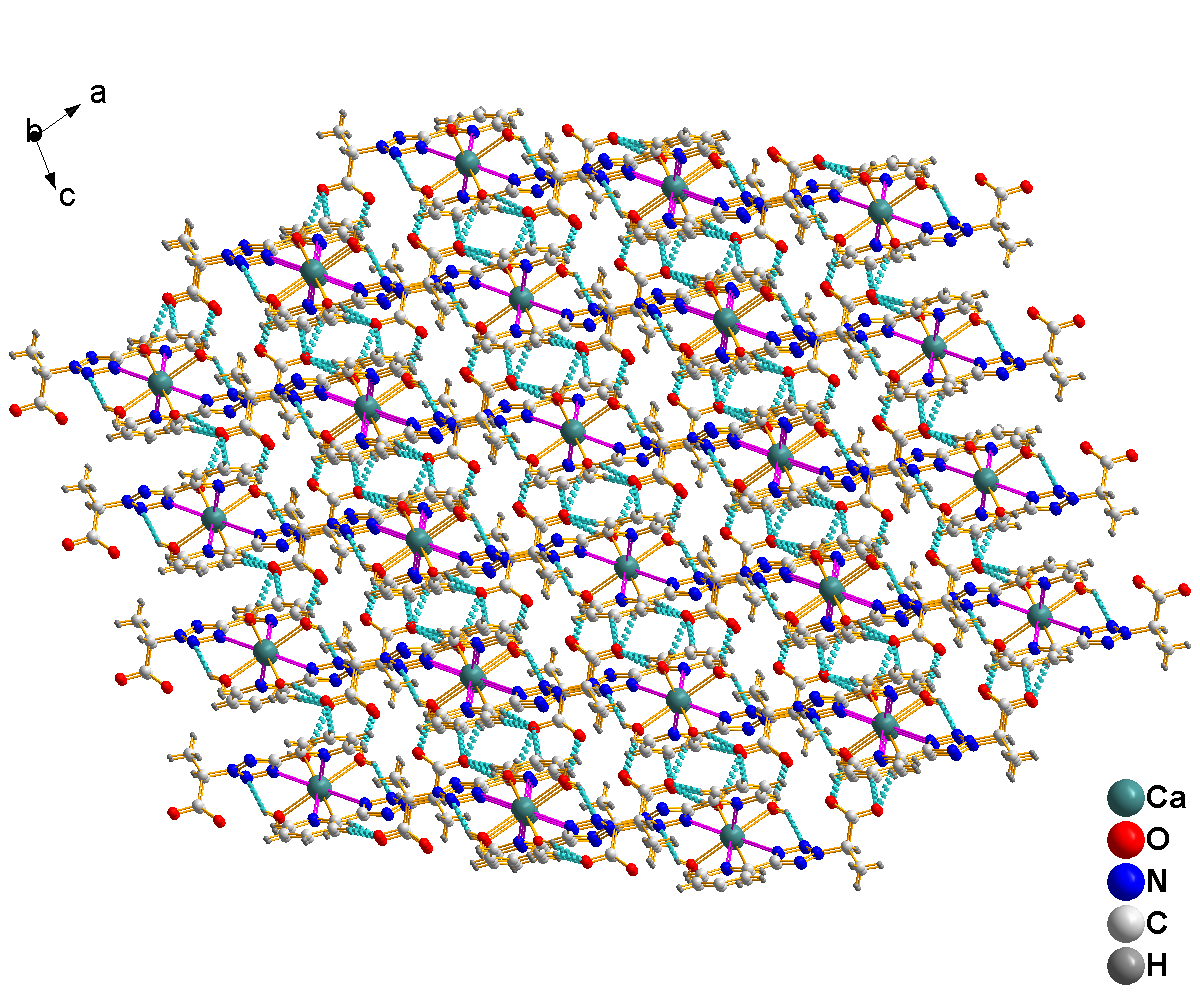


Figure S1. Three-dimensional network structure of **1** formed by hydrogen bonds.


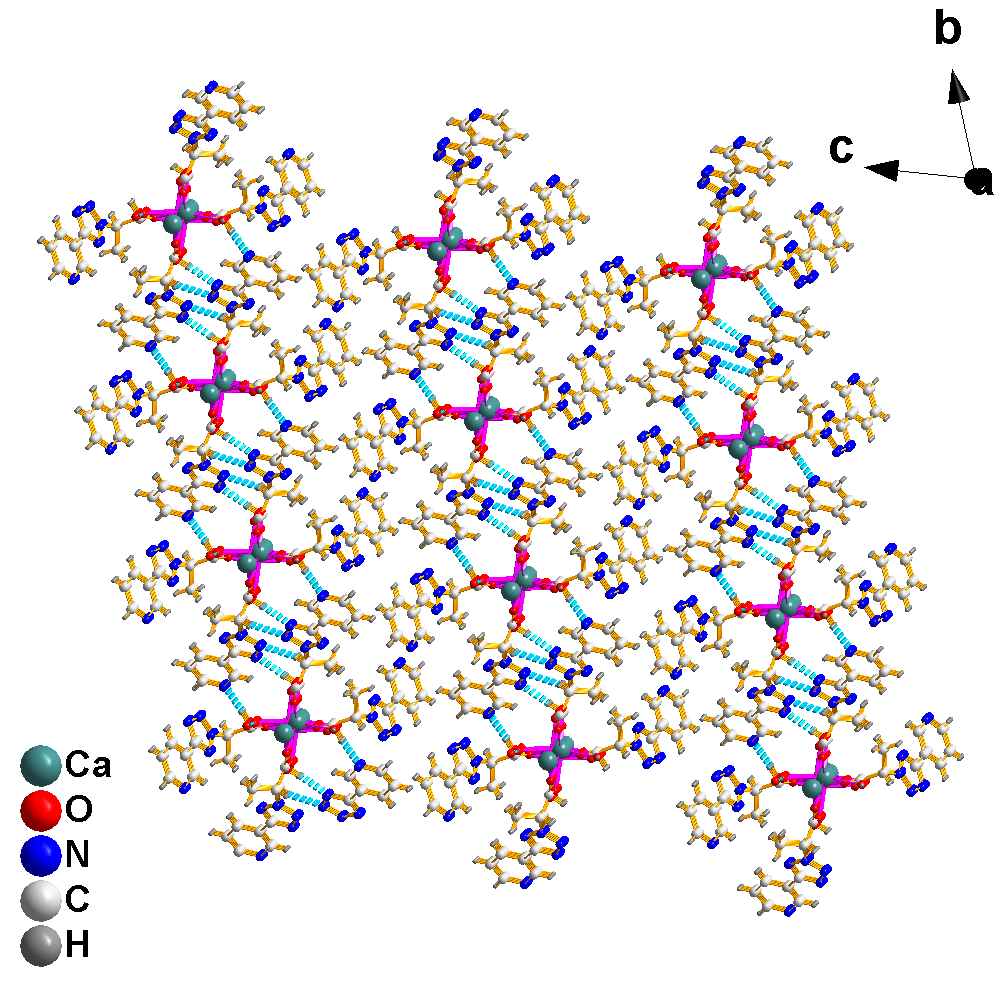


Figure S2. Three-dimensional network structure of **2** formed by hydrogen bonds.
